# Supplementary material
Source: Royal Society of Chemistry journal article supplement (doi:10.1039/d6tb00517a)
Supplement: d6tb00517a1.pdf [file d6tb00517a1.pdf]

## Supporting Information

### A shikonin-based self-assembled nanomedicine alleviates DSS-induced colitis involving HDC-associated histamine regulation and gut microbiota modulation

Wang Zhang<sup>a</sup>, Jingrou Sun<sup>a</sup>, Ying Ou<sup>a</sup>, Jing Zhang<sup>a</sup>, Yilan Bai<sup>a</sup>, Jingxi Hong<sup>a</sup>, Lingchang Meng<sup>b</sup>, Yi Song<sup>b</sup>, Tiepeng Wang<sup>b</sup>, Zhiting Sun<sup>b#</sup>, Jing Wu<sup>a,b#</sup>

a. Department of Traditional Chinese Medicine, Nanjing Drum Tower Hospital, Nanjing Drum Tower Hospital Clinical College of Nanjing University of Chinese Medicine, Nanjing 210008, People's Republic of China;

b. The Institute of Chinese Medicine of Nanjing University, Nanjing Drum Tower Hospital, Affiliated Hospital of Medical School, Nanjing University, Nanjing 210008, People's Republic of China;

# Corresponding author

Correspondence to: Jing Wu, wujing@njucm.edu.cn

Zhiting Sun, sz19910817@163.com

**Table S1. Disease Activity Index (DAI) score**

| Score | weight loss (%) | Stoll consistency | Bleeding          |
|-------|-----------------|-------------------|-------------------|
| 0     | 0               | Normal            | Normal            |
| 1     | 1-5             | -                 | -                 |
| 2     | 5-10            | Muroid stools     | Moderate bleeding |
| 3     | 10-20           | -                 | -                 |
| 4     | >20             | Diarrhea          | Gross bleeding    |

**Table S2. Primer sequences**

| Primer         | FORWARD                  | REVERSE                   |
|----------------|--------------------------|---------------------------|
| $\beta$ -actin | TGGCACCACACCTTCTACAATGAG | GAGGCATACAGGGACAGCACAG    |
| TNF- $\alpha$  | ACGTGGAAGTGGCAGAAGAGG    | TGAGAAGAGGCTGAGACATAGGC   |
| IL-1 $\beta$   | TCGCAGCAGCACATCAACAAG    | TCCACGGGAAAGACACAGGTAG    |
| IL-6           | CGGAGAGGAGACTTCACAGAGG   | TTCCACGATTTCCCAGAGAACATG  |
| HDC            | TCTACCTCCGACATGCCAACTC   | CCGAAGGACCGAATCACAACC     |
| PKM2           | TGCGGTGGCTCTGGATAACAAG   | ACAGGATGTTCTCGTCACACTTCTC |

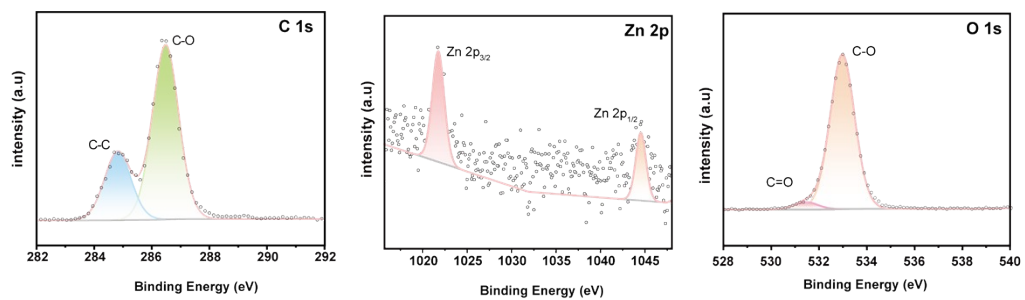

**Figure S1. High-resolution XPS spectra of Zn-SHK-PEG NPs.**

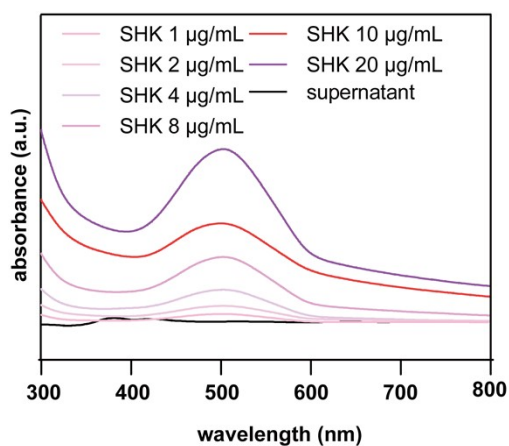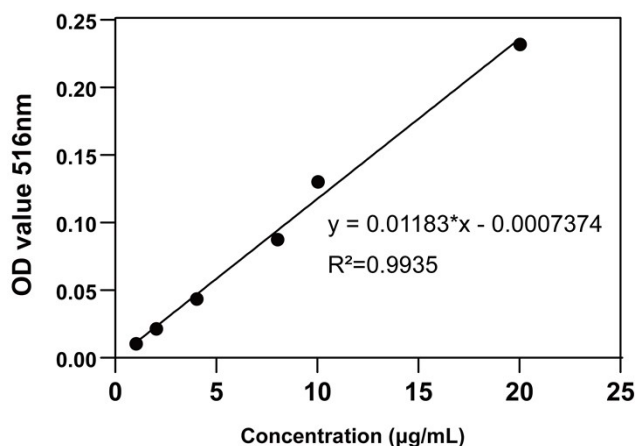

**Figure S2. UV-Vis spectra and calibration curve of SHK at 516 nm for quantification of free SHK in the nanoparticle supernatant.**

| <b>Sample</b>                                     | <b>Zn Concentration</b> | <b>RSD</b> |
|---------------------------------------------------|-------------------------|------------|
| 1 mg/mL shikonin-containing nanoparticle solution | 207.57 mg/L             | 0.39%      |

**Table S3. ICP-OES instrumental parameters used for zinc ion concentration analysis.**

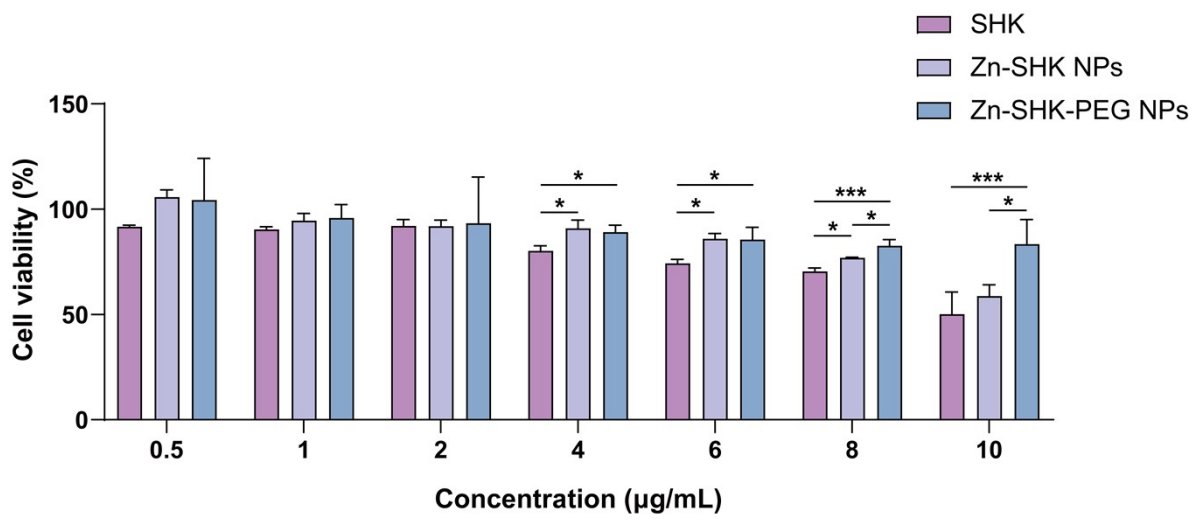

Figure S3. Cytotoxicity assays of SHK, Zn-SHK NPs and Zn-SHK-PEG NPs at different concentrations (at equivalent shikonin concentration) on Caco-2 cells, n=3.

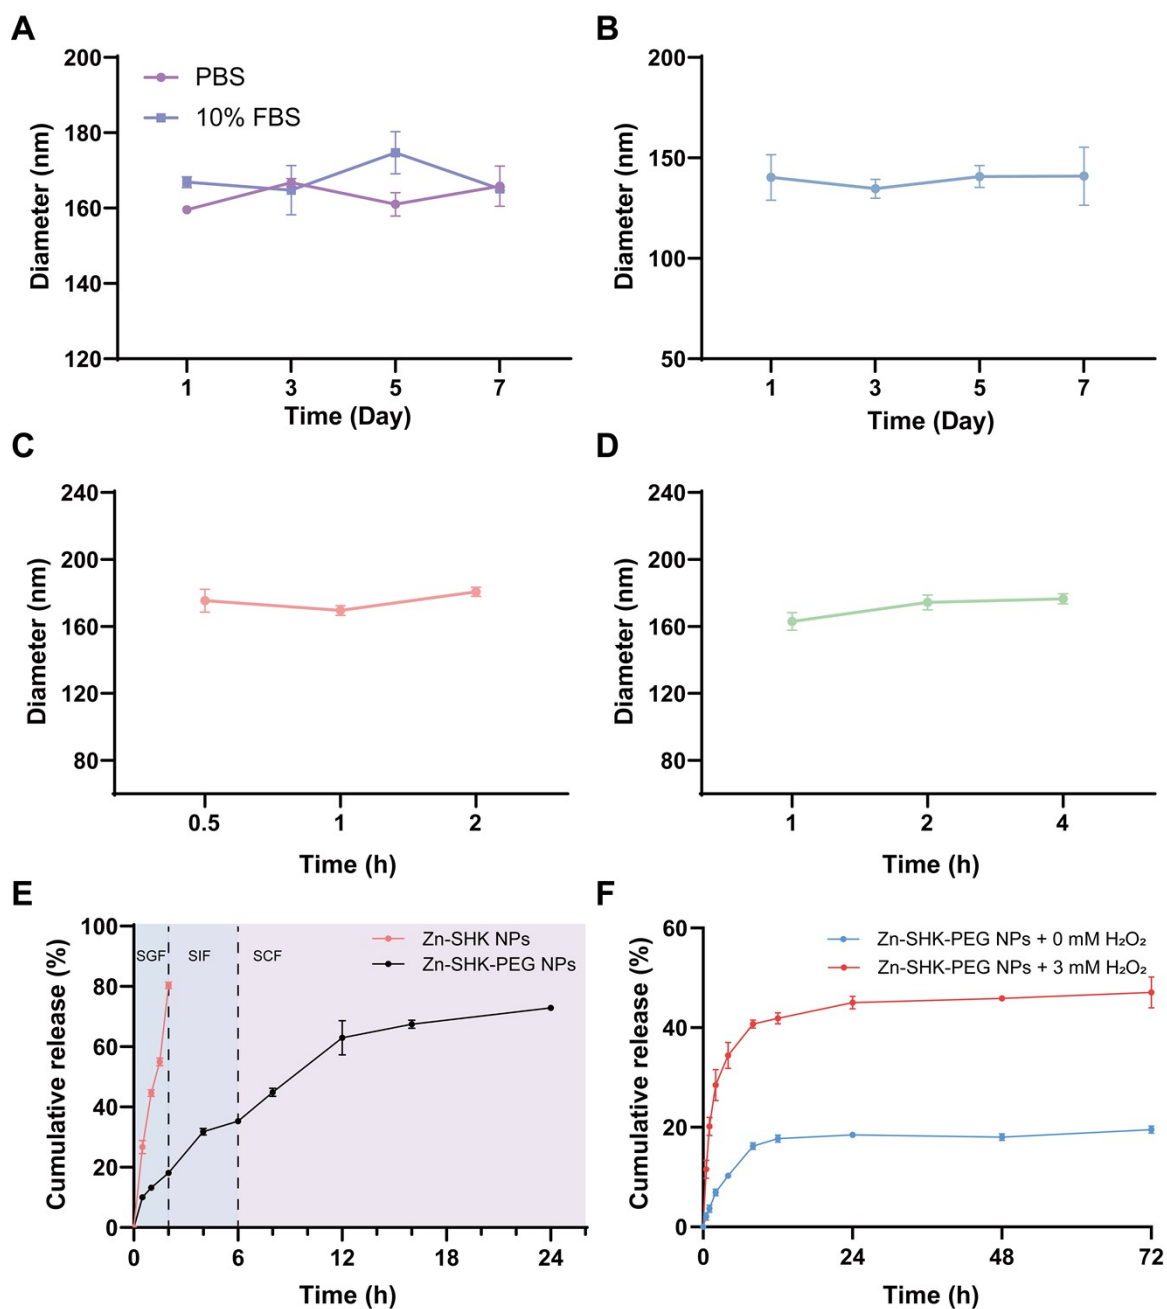

**Figure S4. Colloidal stability and release profiles of Zn-SHK-PEG NPs under physiological gastrointestinal and inflammatory-mimicking conditions.**

(A) Time-dependent hydrodynamic diameter of Zn-SHK-PEG NPs in PBS and 10% FBS, n=3.

(B) Time-dependent hydrodynamic diameter of Zn-SHK-PEG NPs in water, n=3.

(C) Hydrodynamic diameter of Zn-SHK-PEG NPs in simulated gastric fluid (SGF) within the estimated gastric retention time, n=3.

(D) Hydrodynamic diameter of Zn-SHK-PEG NPs in simulated intestinal fluid (SIF) within the estimated intestinal retention time, n=3.

(E) Simulated gastrointestinal release profiles of SHK from Zn-SHK NPs and Zn-SHK-PEG NPs, n=3.

(F) SHK release profiles from Zn-SHK-PEG NPs under physiological conditions and 3 mM H<sub>2</sub>O<sub>2</sub>-induced inflammatory-mimicking conditions, n=3.



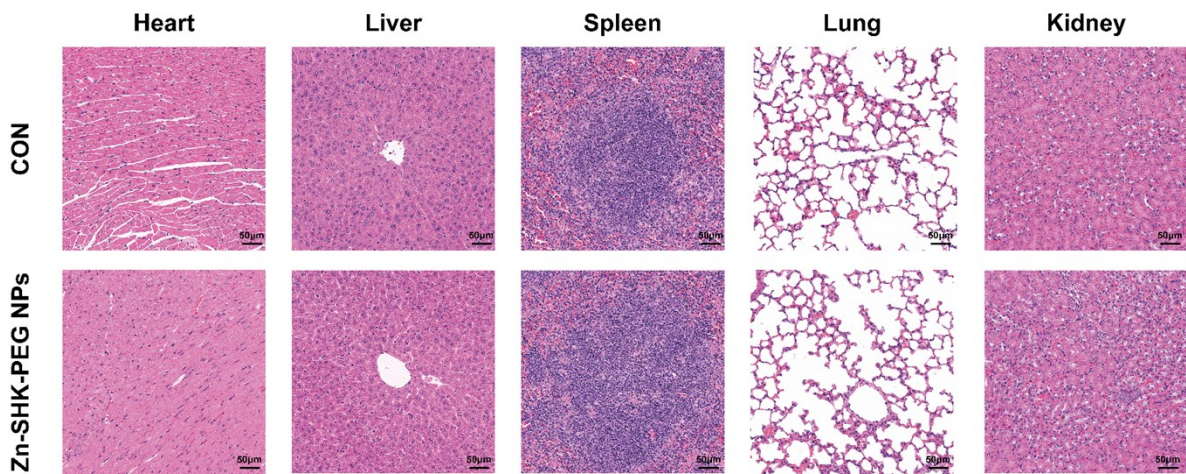

Figure S5. H&E analysis of hearts, livers, spleens, lungs, and kidneys tissues of mice from CON and Zn-SHK-PEG NPs, n=3.

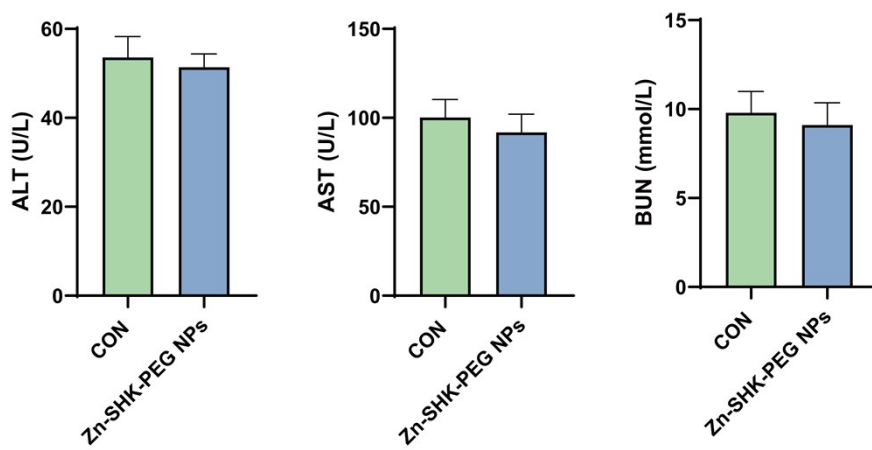

Figure S6. Serum biochemical analysis of mice after Zn-SHK-PEG NPs administration, n=3.
